# Supplementary material
Source: Frontiers journal article supplement (https://www.frontiersin.org/articles/279354)
Supplement: Presentation_1.PDF [file Presentation_1.PDF]

**Small and Intermediate Calcium-Activated  
Potassium Channel Openers improve  
Rat Endothelial and Erectile Function**

S Comerma-Steffensen<sup>1,2\*</sup>, I Carvacho<sup>1,3,4</sup>, E R Hedegaard<sup>1</sup>, and U Simonsen<sup>1</sup>

**Supplementary figures**

Figure S1A

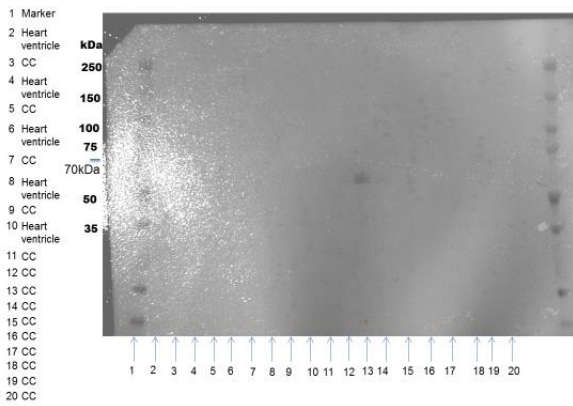

Figure S1B

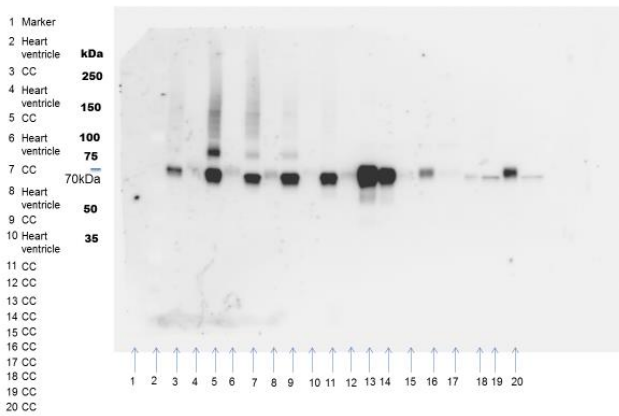

Figure S1C

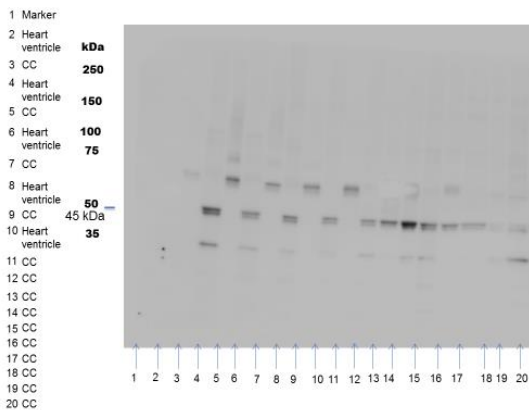

**Suppl. Figure S1** A) Original membrane showing markers visualized by epi-luminescence, B) The same membrane exposed to chemiluminescence to reveal the immunoblotting for  $K_{Ca2.3}$  channels in the heart and *corpus cavernosum* of the rat and C) Original chemiluminescence of

membrane of pan-actin antibody in heart and *corpus cavernosum* of the rat. Heart n=5 and *corpus cavernosum* n=14.

Figure S2A

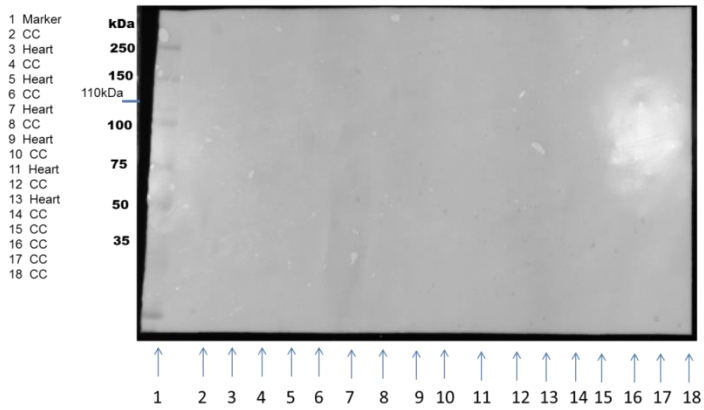

Figure S2B

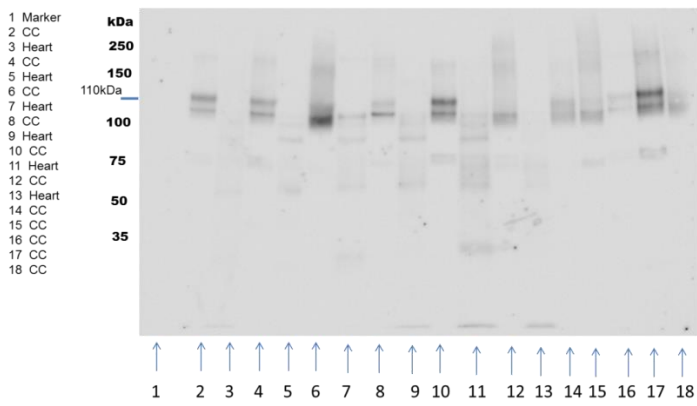

Figure S2C

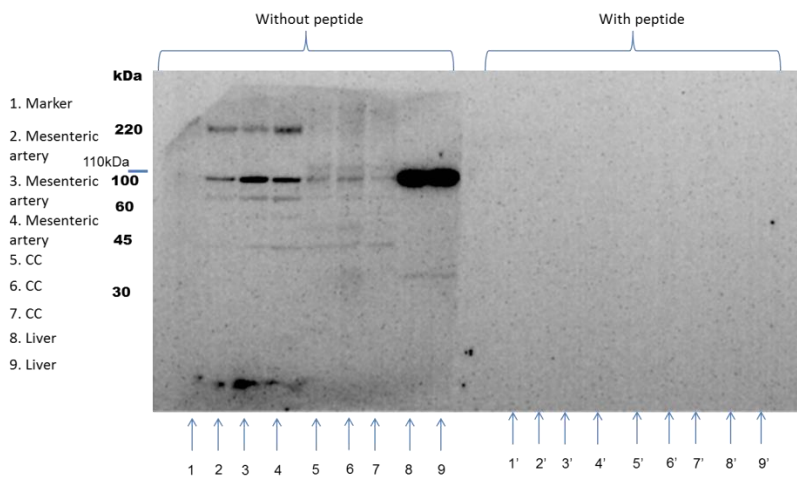

**Suppl. Figure S2.** A) Original membrane showing markers visualized by epi-luminescence, B) The same membrane exposed to chemiluminescence to reveal the immunoblotting for  $K_{Ca1.1}$  samples in

heart and *corpus cavernosum* (CC) of the rat, **B)** Original chemiluminescence blotting of K<sub>Ca</sub>1.1 antibody in heart and *corpus cavernosum* (CC) of the rat. Heart n=6 and *corpus cavernosum* n=11.

C) Original chemiluminescence picture showing K<sub>Ca</sub>1.1 alpha in *corpus cavernosum* (CC) of the rat. Mesenteric artery n=3, *corpus cavernosum* n=3 and Liver n=2. Left side membrane of is shown minus peptide and right side incubated with peptide used to raise the antibody for K<sub>Ca</sub>1.1.

**Figure S3A**

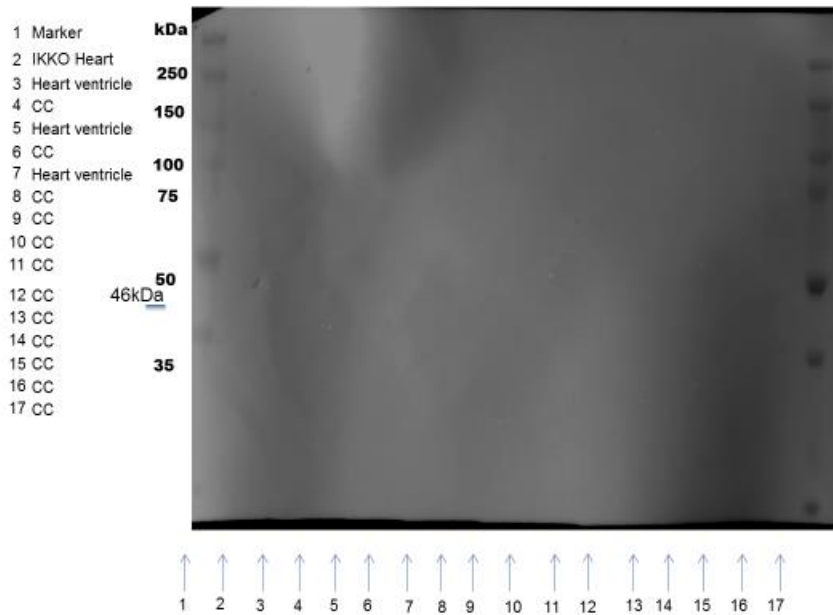

**Figure S3B**

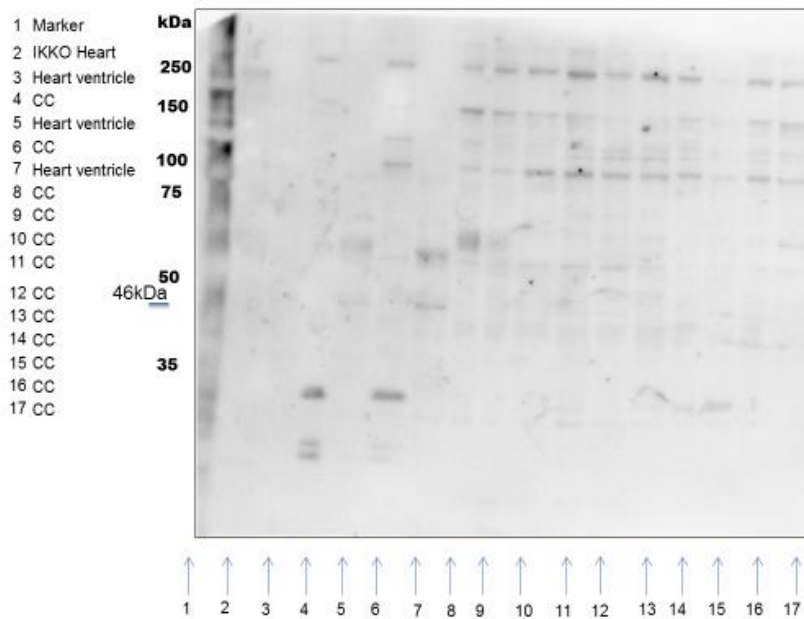

**Suppl. Figure S3.** A) Original membrane epi-illumination of  $K_{Ca}3.1$  antibody in heart and *corpus cavernosum* (CC) of the rat B) Original chemiluminescence (blotting) of  $K_{Ca}3.1$  antibody in heart and *corpus cavernosum* (CC) of the rat.  $K_{Ca}3.1$  knockout mouse (IKKO) heart n=1, Rat heart n= 3 and *corpus cavernosum* n=12.

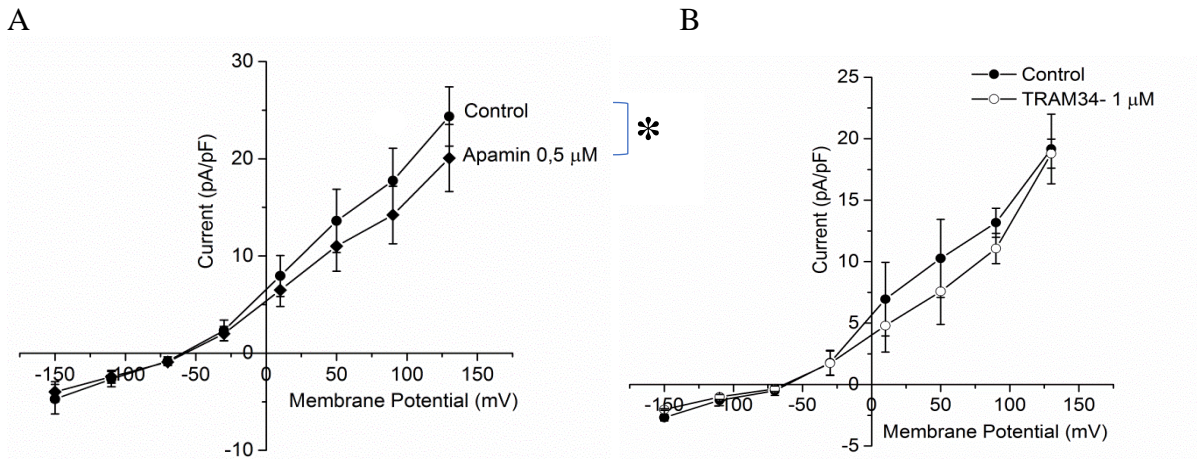

**Suppl. Figure S4.** Whole-cell voltage clamp recordings of currents evoked from voltage steps in primary cultures of endothelial cells from rat *corpus cavernosum*. (A) Whole-cell voltage clamp recordings of currents evoked from voltage steps (-140 to +140 mV) in control cells (*filled circles*) or in presence of 0,5 μM apamin (*filled diamonds*). (B) Whole-cell voltage clamp recordings of currents evoked from voltage steps (-140 to +140 mV) in control cells (*filled circles*) or in presence of 1 μM TRAM-34 (*open circles*). Cells were obtained from 3 different rats.

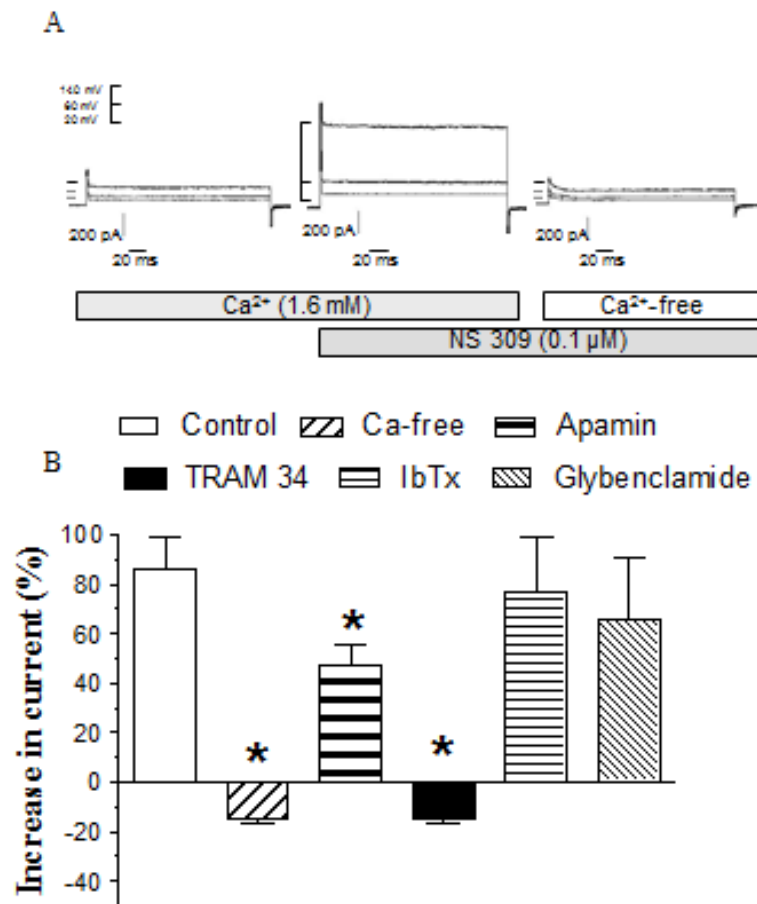

**Suppl. Figure S5.** (A) Whole cell patch clamp recording in human umbilical vein endothelial cell showing the effect of NS309 (0.1 μM) in the presence (Ca<sup>2+</sup>, 1.6 mM) and the absence of intracellular (Ca<sup>2+</sup>-free) calcium. (B) Relative NS309 (0.1 μM) -induced increase in current in HUVECs in the presence and the absence (Ca-free) of calcium and the presence of calcium and different K channel blockers, apamin, TRAM-34 (1 μM), iberitoxin (IbTx, 0.1 μM), and glybenclamide (0.1 μM). Modified from Stankevicius et al., 2011. Data are expressed as means ± S.E.M. \*P≤0.05, significantly different from control. Human umbilical venous endothelial cells – HUVEC.



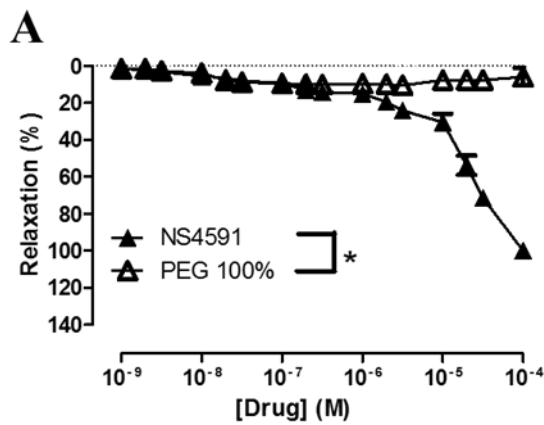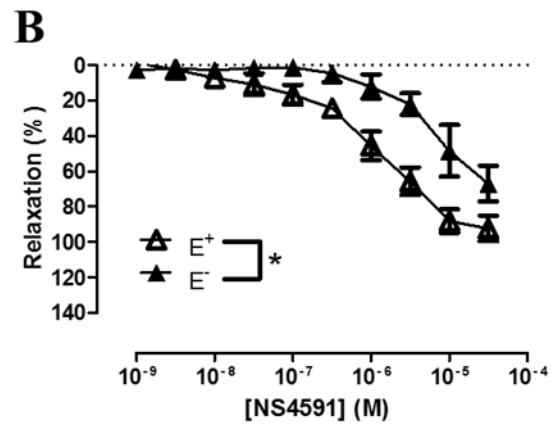

**Suppl. Figure S6. Relaxations by induced by NS4591 in rat *corpus cavernosum*.** (A) Effect of vehicle PEG 100% and of NS4591 in rat *corpus cavernosum* strips contracted with noradrenaline. (B) Relaxations induced by NS4591 in preparations with (n=5) and without endothelium (n=5). \*P≤0.05, curves were significantly different, two-way ANOVA followed by a Bonferroni post-test.

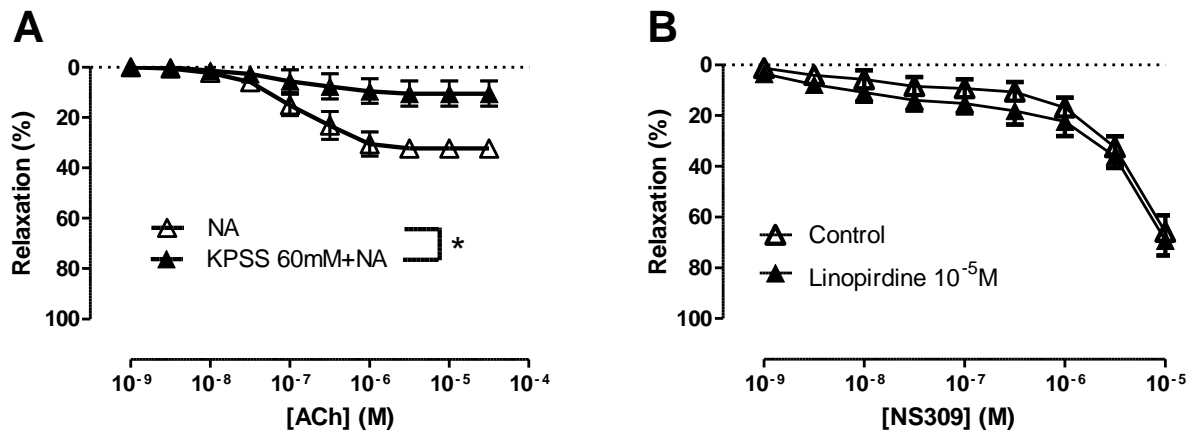

**Suppl. Figure S7.** Effect of high extracellular potassium on acetylcholine and NS309 relaxation of rat *corpus cavernosum*. Concentration-response curves for **A**) acetylcholine (ACh) in the absence (n=5) and the presence of high extracellular potassium (60 mM KPSS, n=5), **B**) NS309 in the absence (n=6) and the presence of a blocker of Kv7 channels. Linopirdine (10  $\mu$ M, n=6). Data are expressed as means  $\pm$  S.E.M. \*P $\leq$ 0.05, curves were significantly different, two-way ANOVA followed by a Bonferroni post-test.

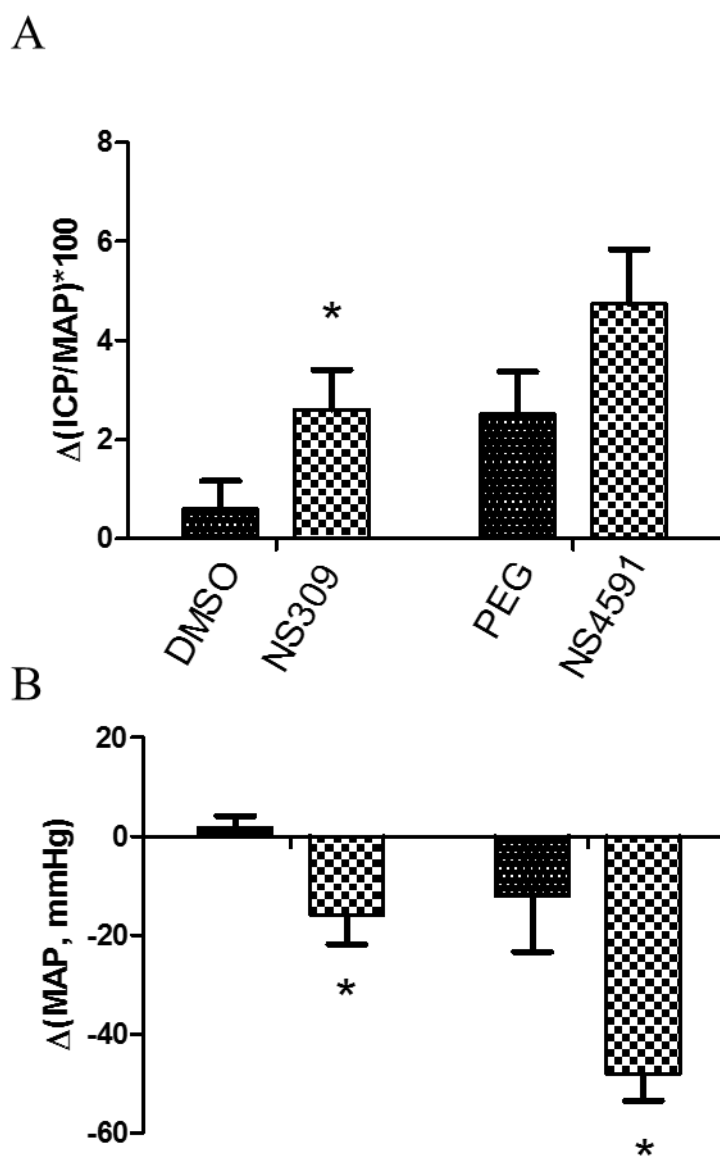

**Suppl. Figure S8. Changes of and mean arterial pressure during and 1 min after infusion of NS309 and NS4591.** (A) Changes in erectile function measured as intracavernosal pressure over mean arterial pressure ( $\Delta\text{ICP}/\text{MAP} \times 100$ ) induced by (A) the vehicle DMSO (n=7), NS309 (1 mg/Kg, n=5), the vehicle PEG (n=7), and NS4591 (1 mg/kg, n=6), and (B) changes in mean arterial pressure ( $\Delta\text{MAP}$ , mmHg) induced by DMSO, NS309 (1 mg/Kg), PEG and NS4591 (1 mg/kg). Data are expressed as means  $\pm$  S.E.M. \* $P \leq 0.05$ , significantly different compared to vehicle using Student's t-test.
